# Supplementary material
Source: MDPI journal article supplement (https://www.mdpi.com/2073-4352/10/4/255)
Supplement: s1 [file s1]

# Extended $\pi$ -Systems in Diimine Ligands in $[\text{Cu}(\text{P}^{\wedge}\text{P})(\text{N}^{\wedge}\text{N})][\text{PF}_6]$ Complexes: From 2,2'-Bipyridine to 2-(Pyridin-2-yl)Quinoline

Sarah Keller , Murat Alkan-Zambada, Alessandro Prescimone, Edwin C. Constable  and Catherine E. Housecroft  \*

Department of Chemistry, University of Basel, BPR 1096, Mattenstrasse 24a, CH-4058 Basel, Switzerland; sarah.keller@chimieparistech.psl.eu (S.K.); murat.alkan@epfl.ch (M.A.-Z.); alessandro.prescimone@unibas.ch (A.P.); edwin.constable@unibas.ch (E.C.C.)

\* Correspondence: catherine.housecroft@unibas.ch; Tel: +41 61 207 100

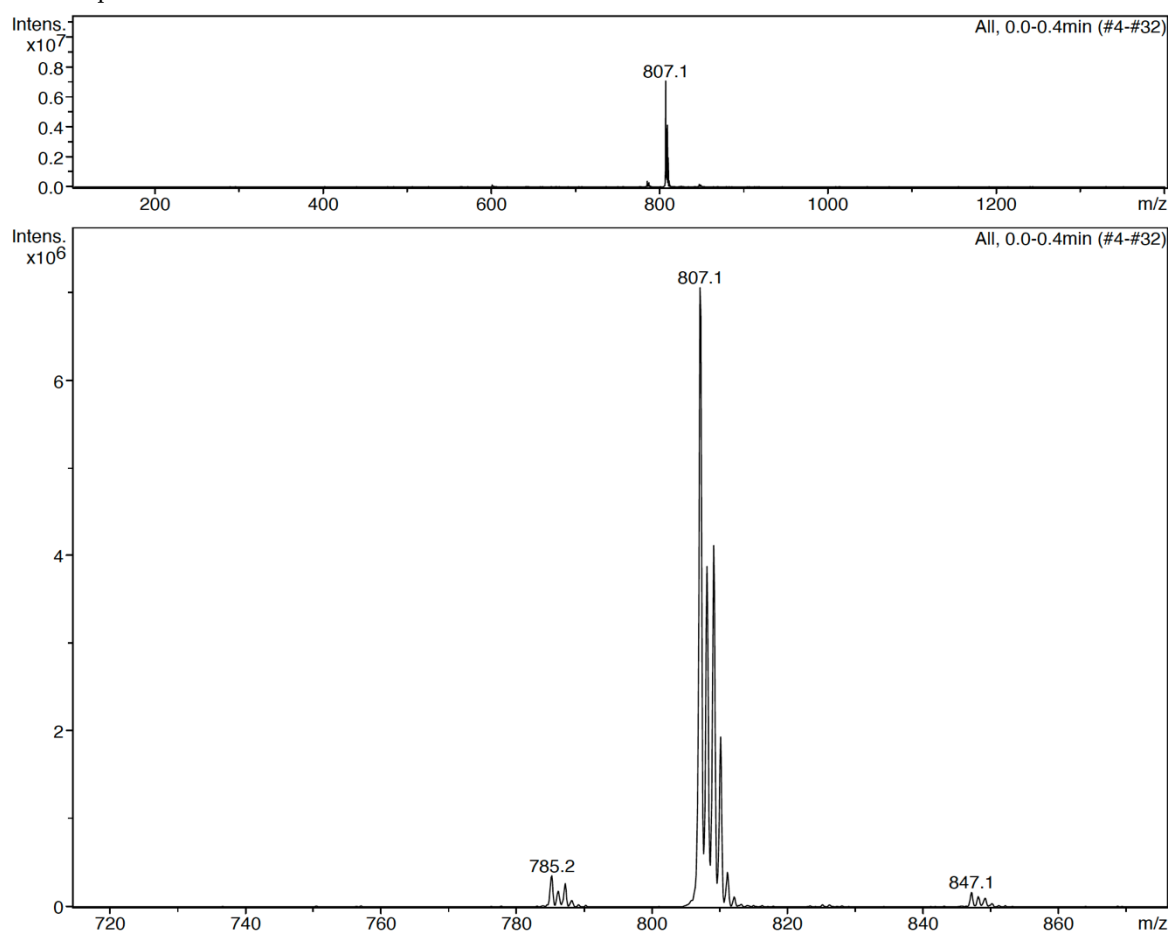

**Figure S1.** Electrospray mass spectrum of  $[\text{Cu}(\text{POP})(1)][\text{PF}_6]$ , positive mode.

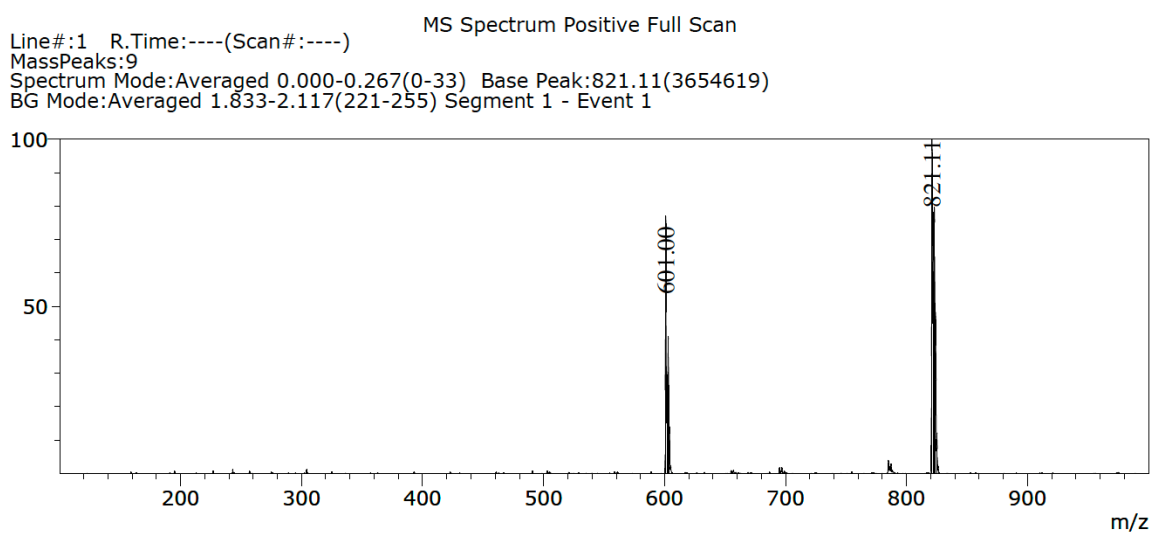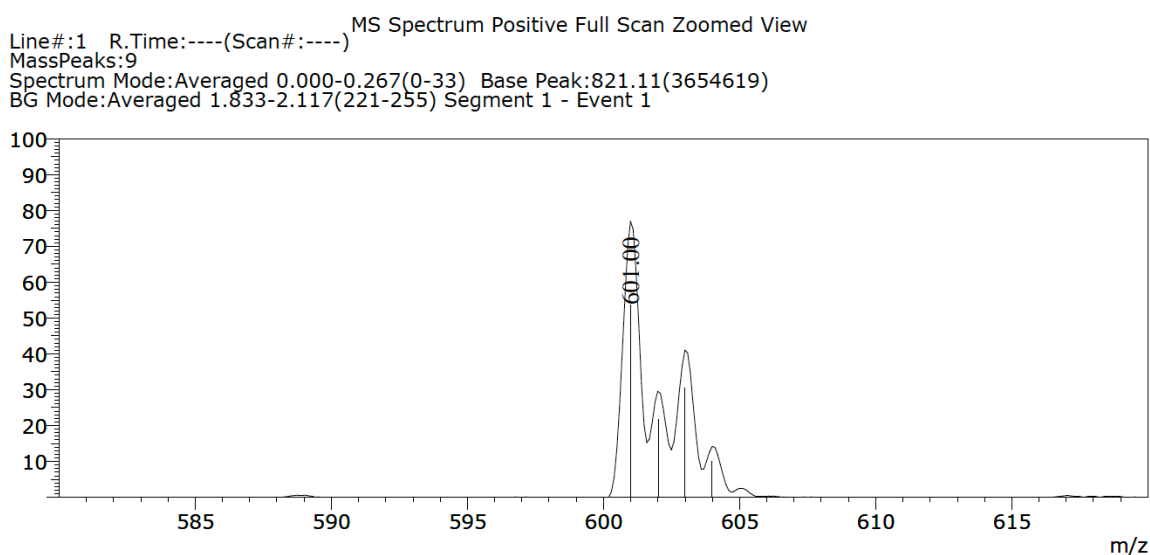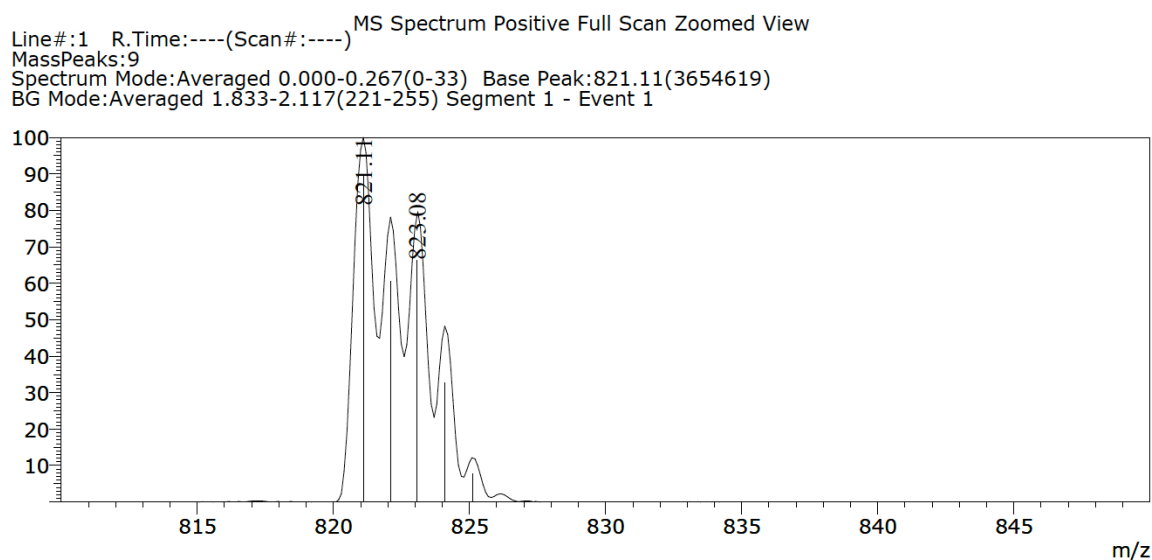

Figure S2. Electrospray mass spectrum of [Cu(POP)(2)][PF<sub>6</sub>], positive mode.

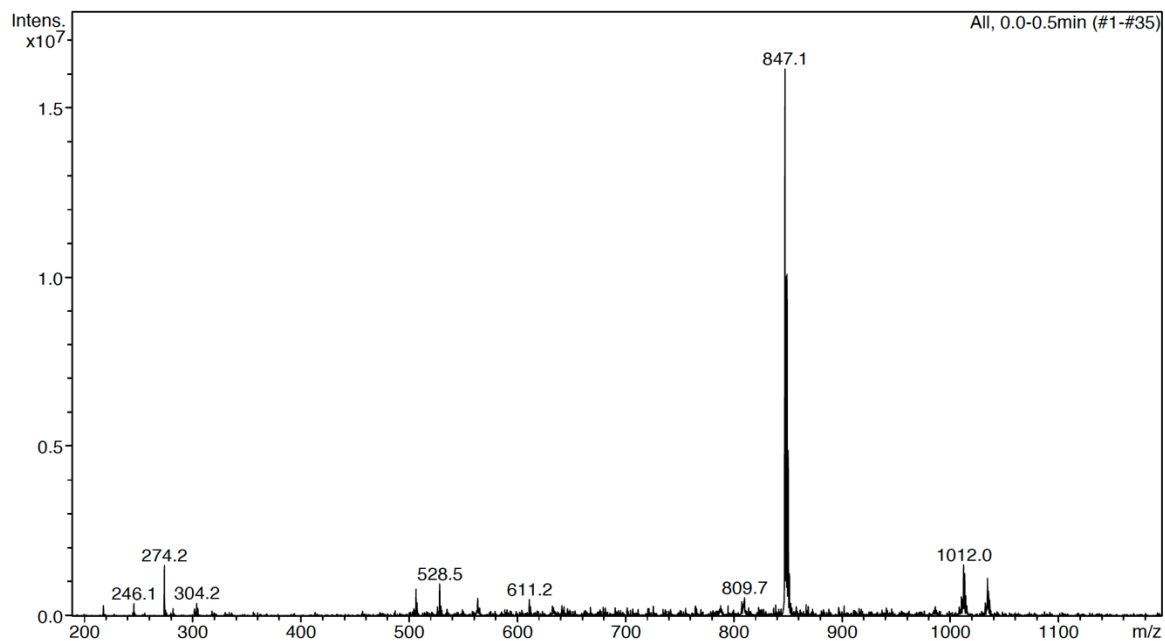

**Figure S3.** Electrospray mass spectrum of [Cu(xantphos)(1)][PF<sub>6</sub>], positive mode.

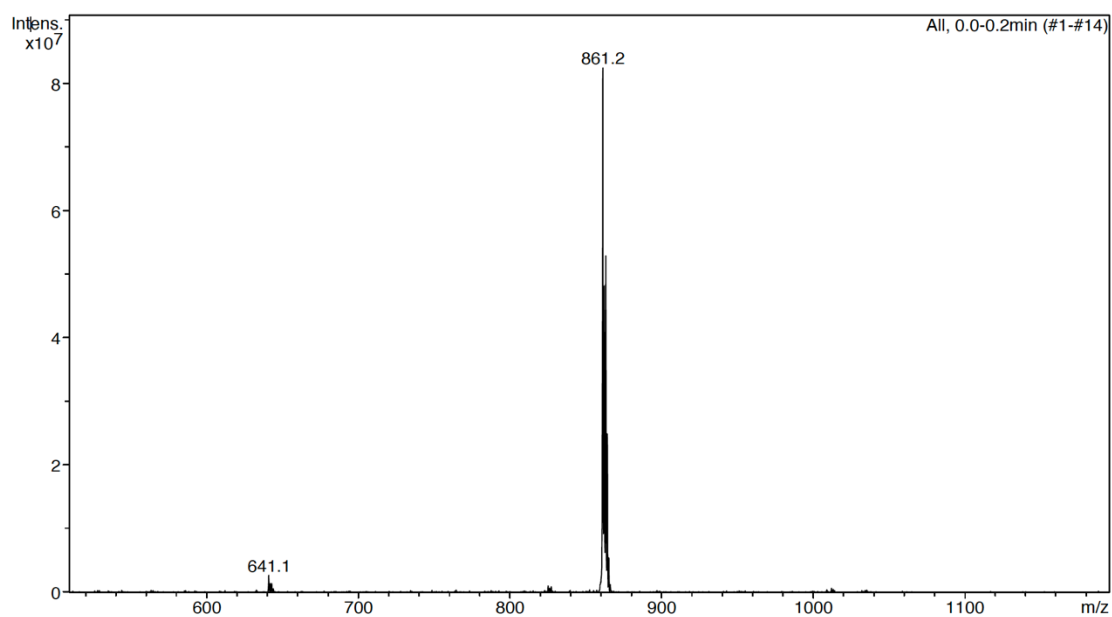

**Figure S4.** Electrospray mass spectrum of [Cu(xantphos)(2)][PF<sub>6</sub>], positive mode.

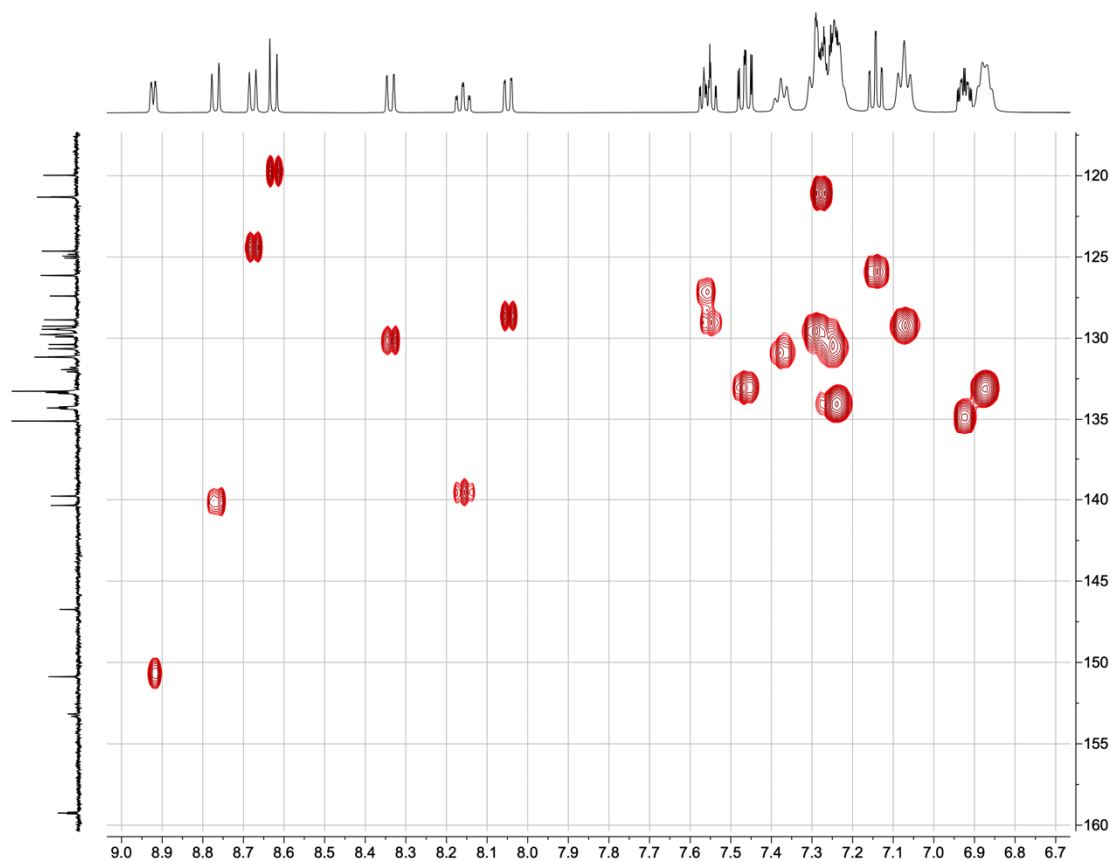

Figure S5. HMOC spectrum (500 MHz  $^1\text{H}$ , 126 MHz  $^{13}\text{C}$ , 298 K, acetone- $d_6$ ) of  $[\text{Cu}(\text{POP})(1)][\text{PF}_6]$ .

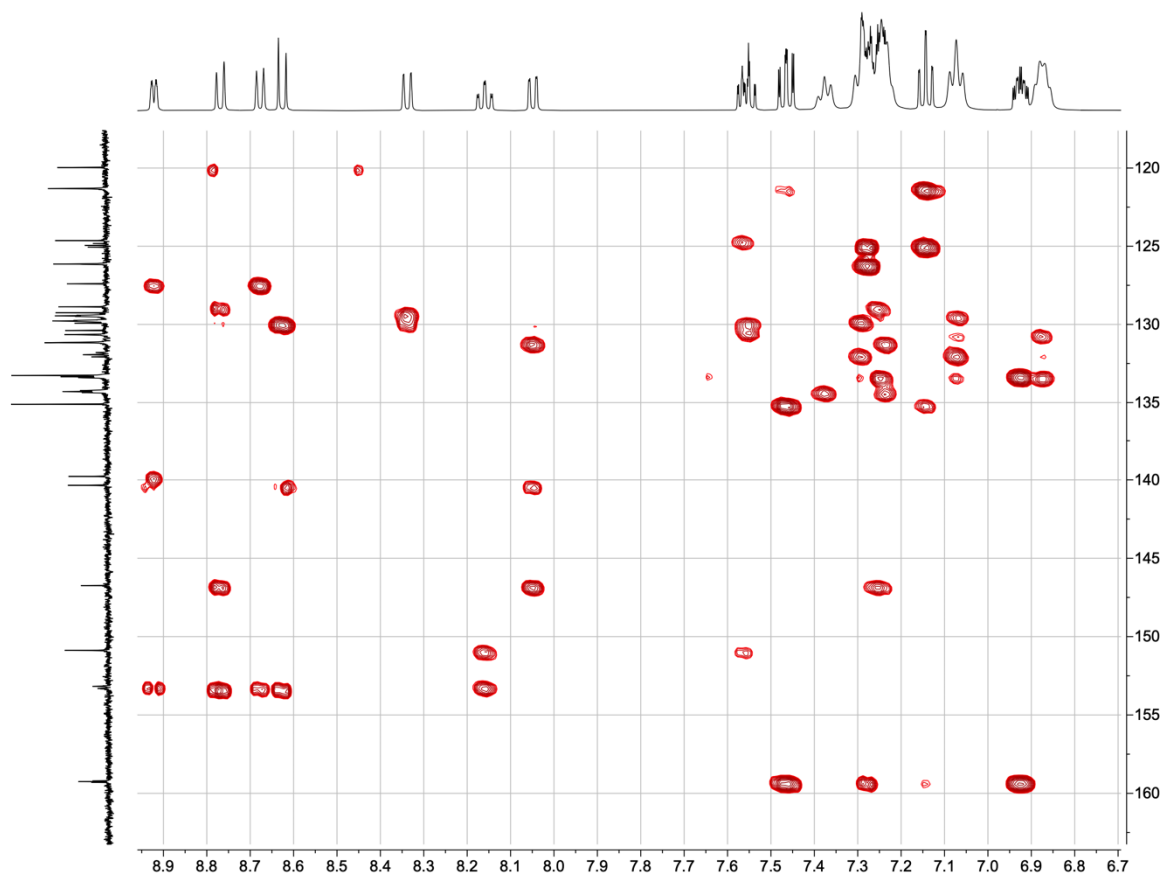

**Figure S6.** HMBC spectrum (500 MHz  $^1\text{H}$ , 126 MHz  $^{13}\text{C}$ , 298 K, acetone- $d_6$ ) of  $[\text{Cu}(\text{POP})(1)][\text{PF}_6]$ .

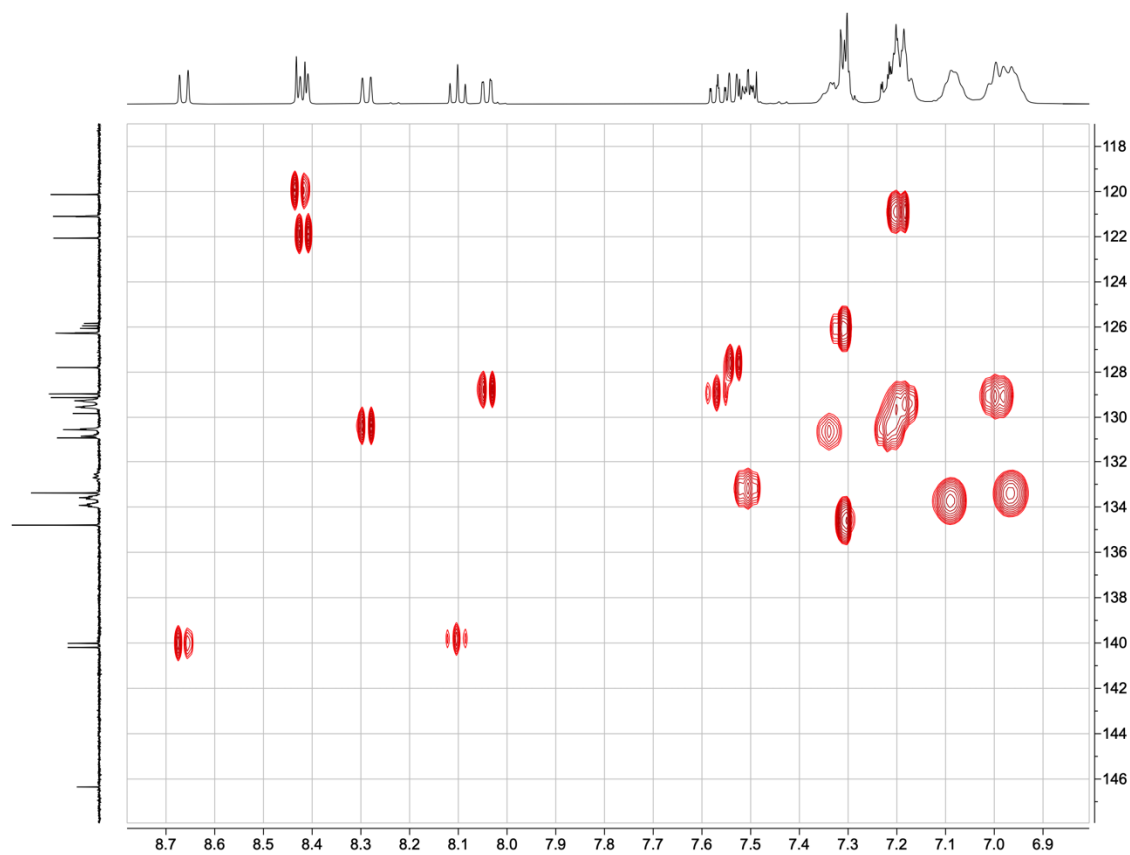

**Figure S7.** Aromatic region of the HMQC spectrum (500 MHz  $^1\text{H}$ , 126 MHz  $^{13}\text{C}$ , 298 K, acetone- $d_6$ ) of  $[\text{Cu}(\text{POP})(2)][\text{PF}_6]$ .

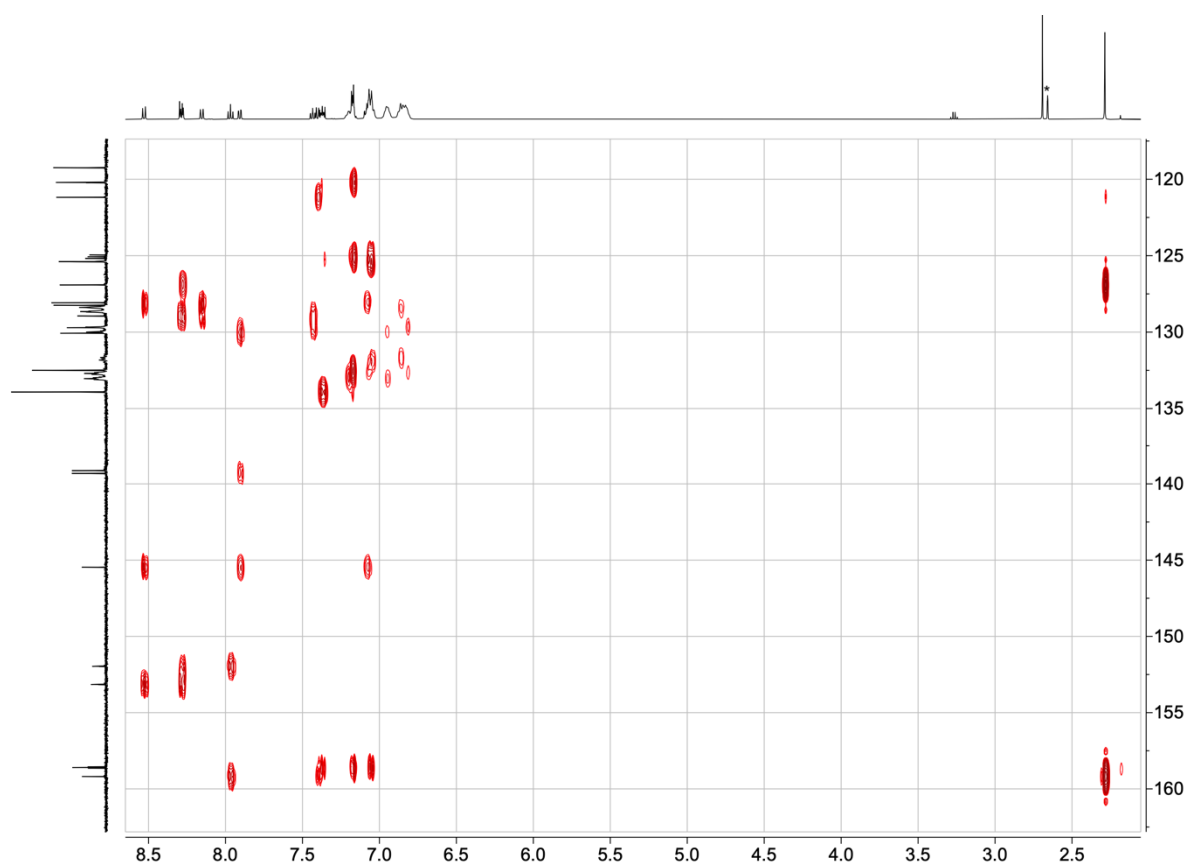

**Figure S8.** Part of the HMBC spectrum (500 MHz  $^1\text{H}$ , 126 MHz  $^{13}\text{C}$ , 298 K, acetone- $d_6$ ) of  $[\text{Cu}(\text{POP})(2)][\text{PF}_6]$ . \* =  $\text{H}_2\text{O}$  and  $\text{HOD}$ .

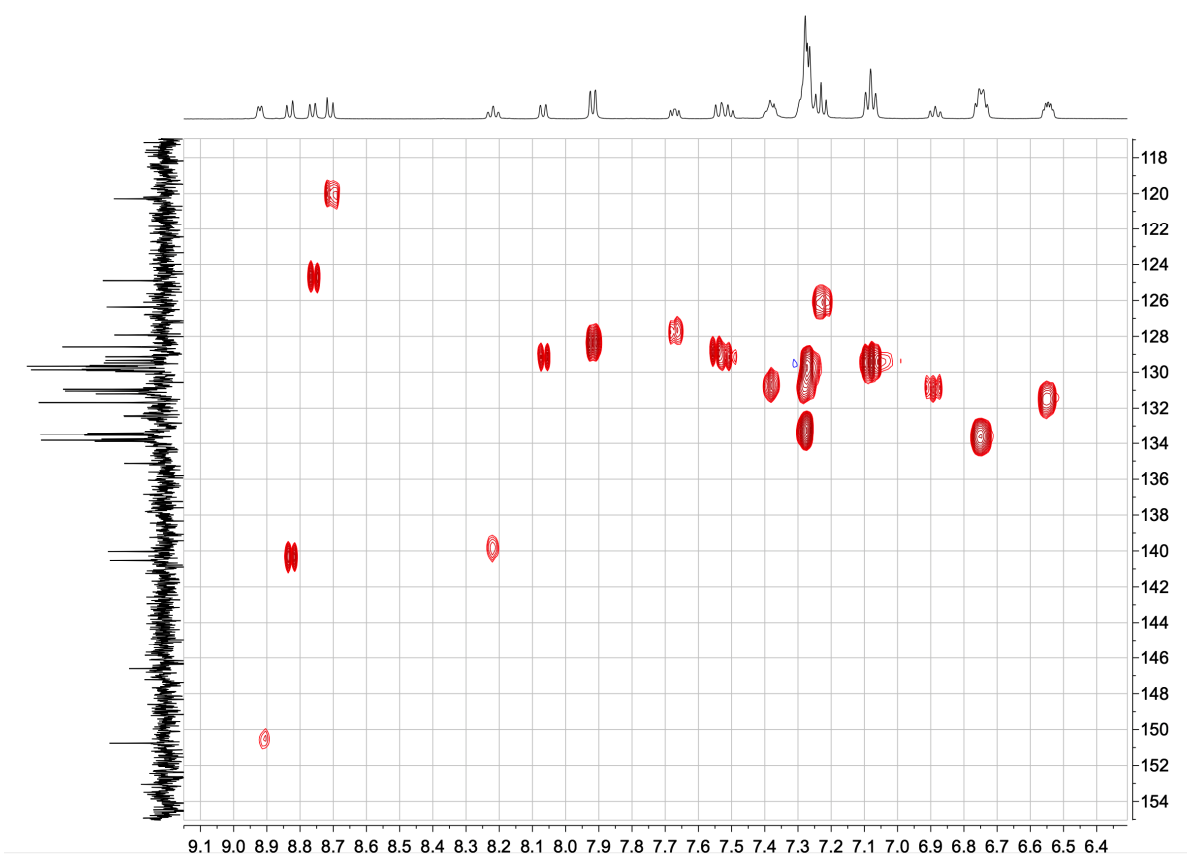

**Figure S9.** Part of the HMQC spectrum (500 MHz  $^1\text{H}$ , 126 MHz  $^{13}\text{C}$ , 298 K, acetone- $d_6$ ) of  $[\text{Cu}(\text{xantphos})(1)][\text{PF}_6]$ .

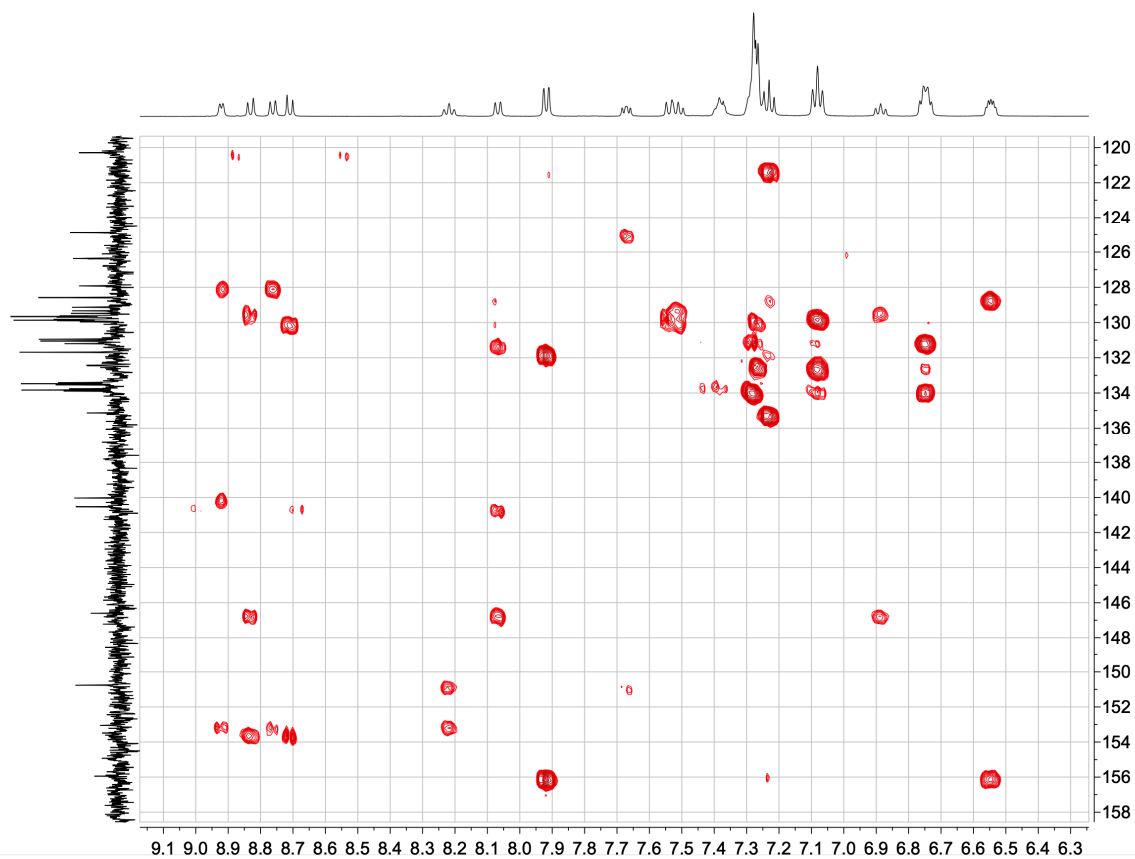

**Figure S10.** Part of the HMBC spectrum (500 MHz  $^1\text{H}$ , 126 MHz  $^{13}\text{C}$ , 298 K, acetone- $d_6$ ) of  $[\text{Cu}(\text{xantphos})(1)][\text{PF}_6]$ .

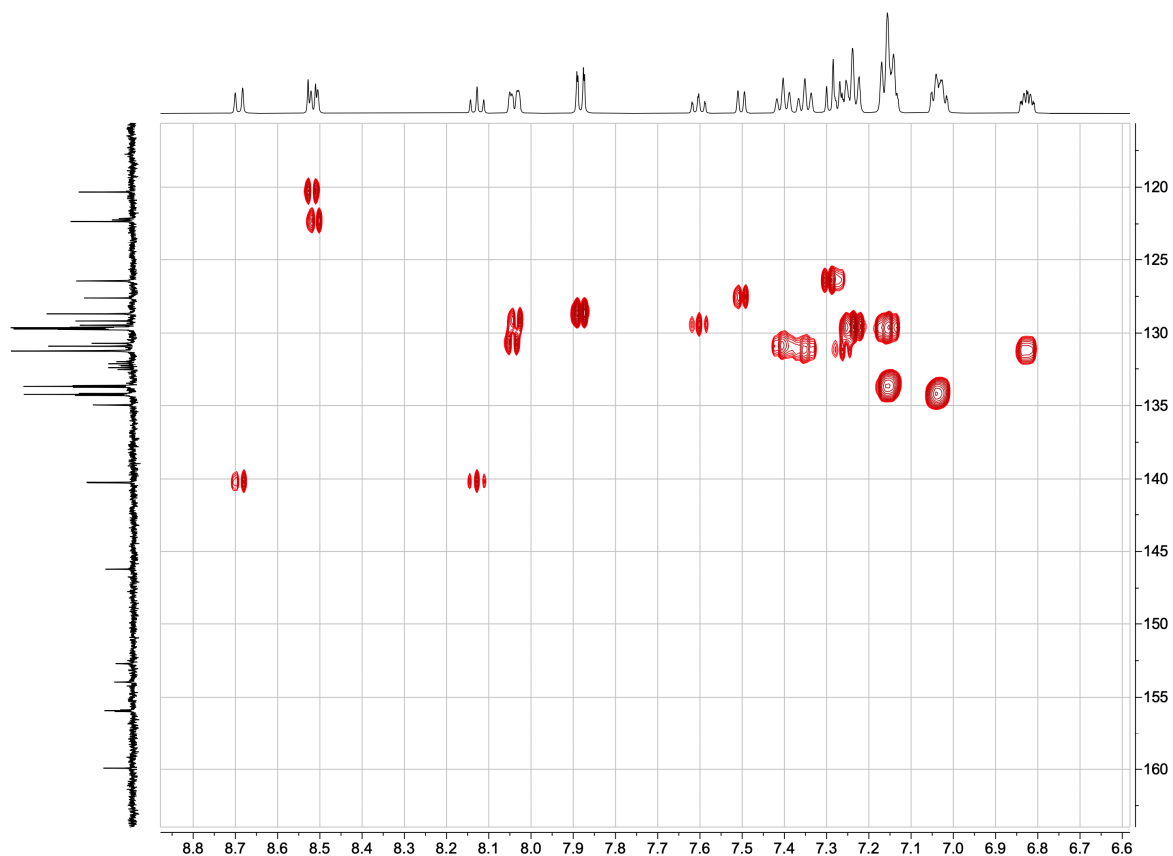

**Figure S11.** Part of the HMQC spectrum (500 MHz  $^1\text{H}$ , 126 MHz  $^{13}\text{C}$ , 298 K, acetone- $d_6$ ) of  $[\text{Cu}(\text{xantphos})(2)][\text{PF}_6]$ .

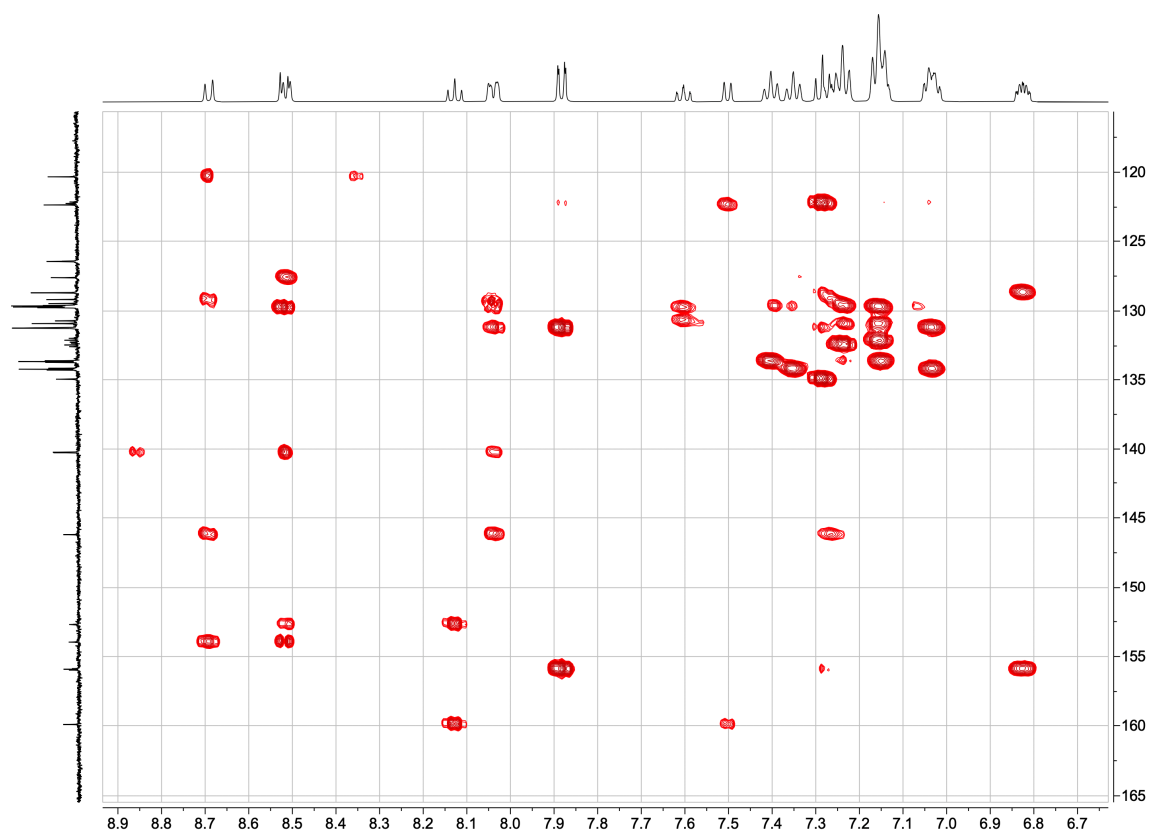



**Figure S12.** Part of the HMBC spectrum (500 MHz  $^1\text{H}$ , 126 MHz  $^{13}\text{C}$ , 298 K, acetone- $d_6$ ) of  $[\text{Cu}(\text{xantphos})(2)][\text{PF}_6]$ .

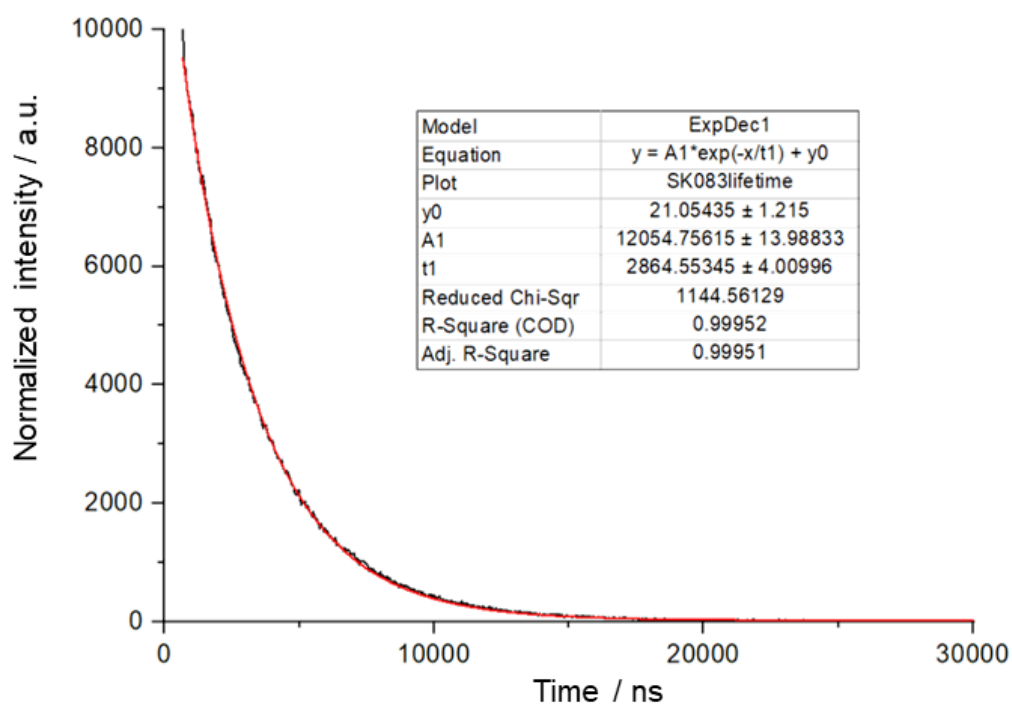

**Figure S13.** Solid-state lifetime decay (black) and first-order fitting curve (red) of  $[\text{Cu}(\text{POP})(1)][\text{PF}_6]$  ( $\lambda_{\text{exc}} = 365$  nm, exponential fitting done with Origin 2020).

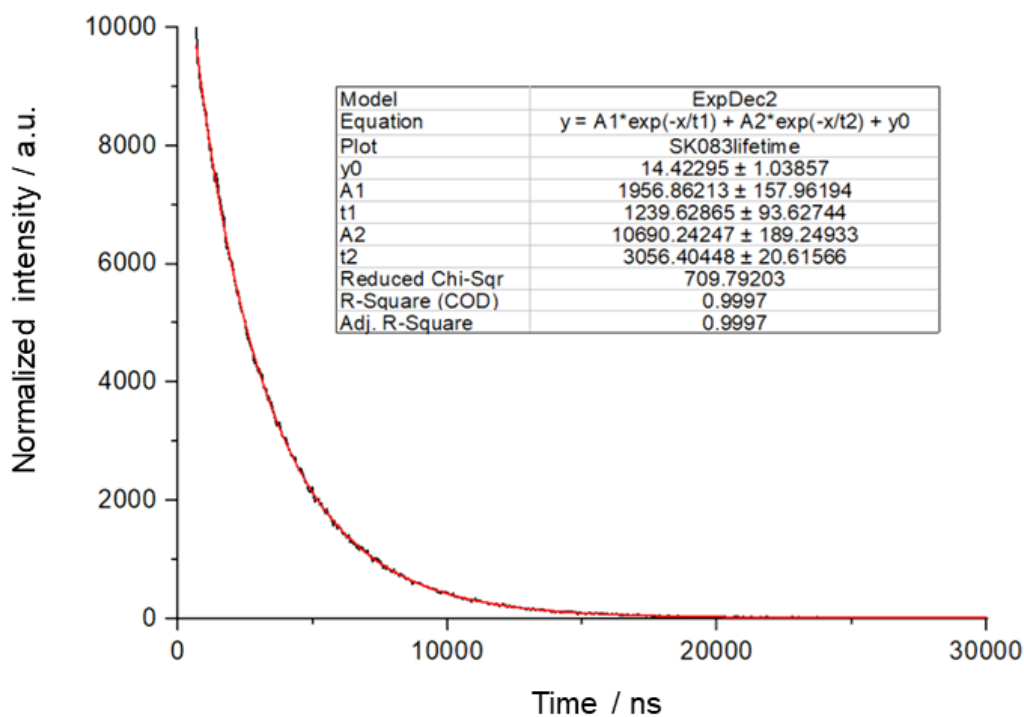

**Figure S14.** Solid-state lifetime decay (black) and second-order fitting curve (red) of  $[\text{Cu}(\text{POP})(1)][\text{PF}_6]$  ( $\lambda_{\text{exc}} = 365$  nm, exponential fitting done with Origin 2020).

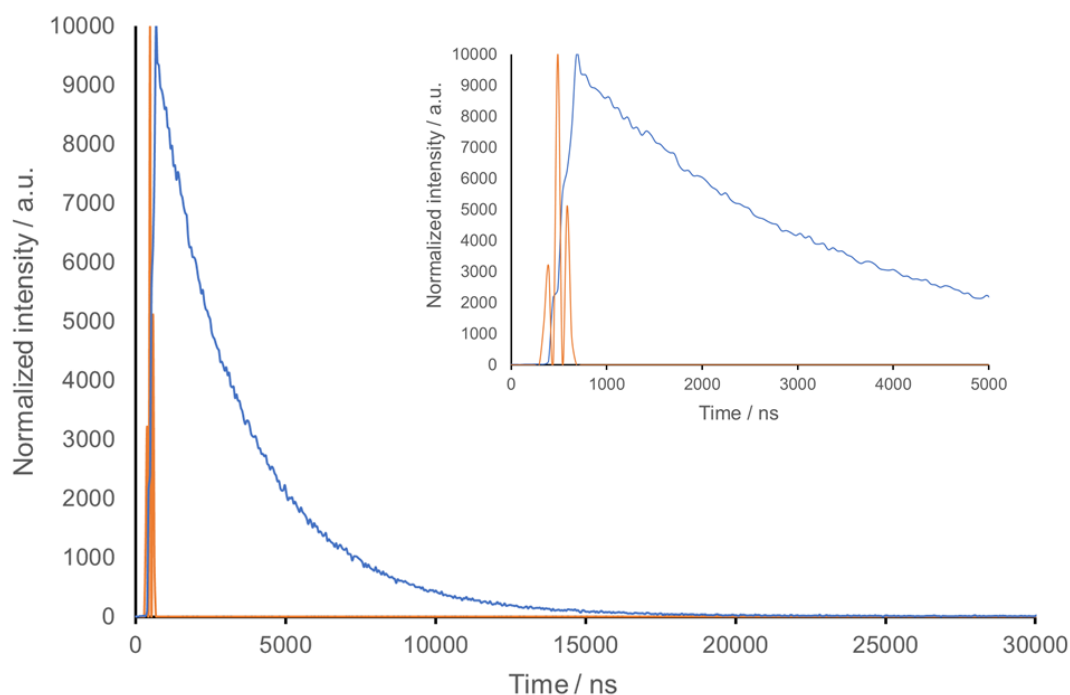

**Figure S15.** Solid-state lifetime decay of [Cu(POP)(1)][PF<sub>6</sub>] (blue) and IRF (orange) ( $\lambda_{\text{exc}} = 365$  nm).

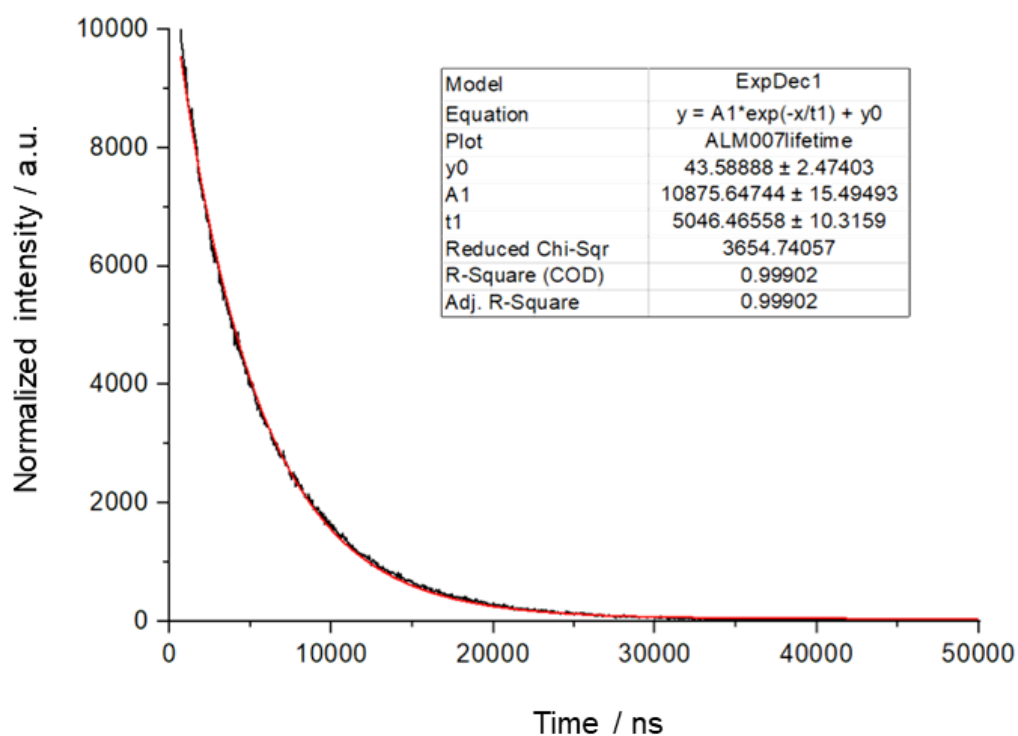

**Figure S16.** Solid-state lifetime decay (black) and first-order fitting curve (red) of [Cu(xantphos)(1)][PF<sub>6</sub>] ( $\lambda_{\text{exc}} = 365$  nm, exponential fitting done with Origin 2020).

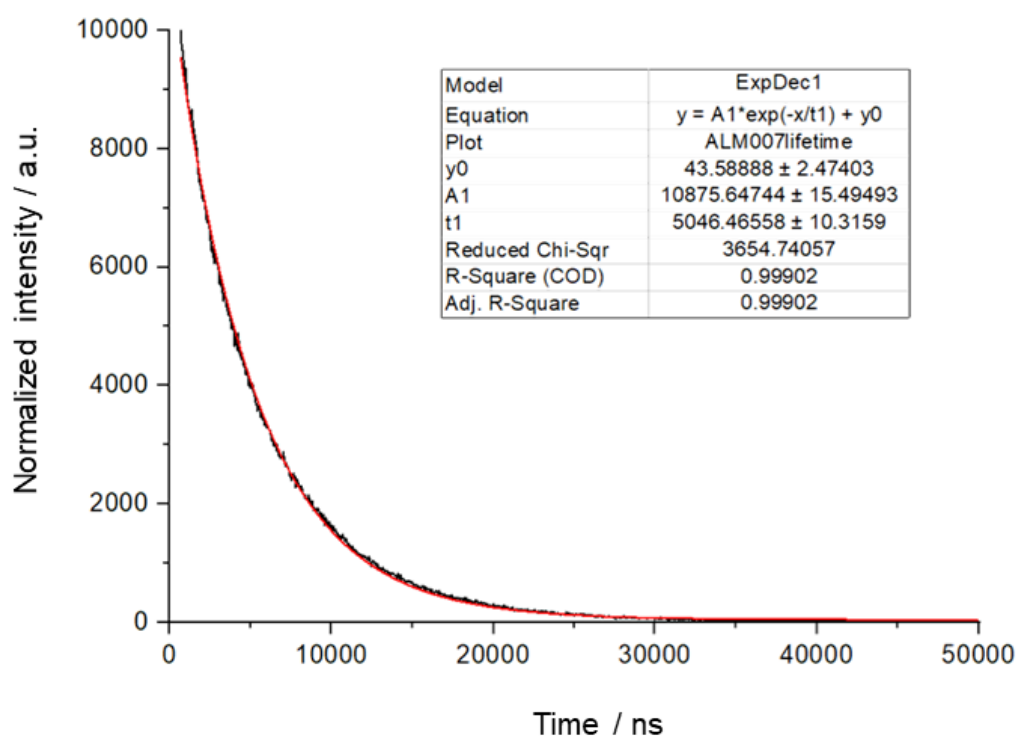

**Figure S17.** Solid-state lifetime decay (black) and second-order fitting curve (red) of [Cu(xantphos)(1)][PF<sub>6</sub>] ( $\lambda_{\text{exc}} = 365$  nm, exponential fitting done with Origin 2020).

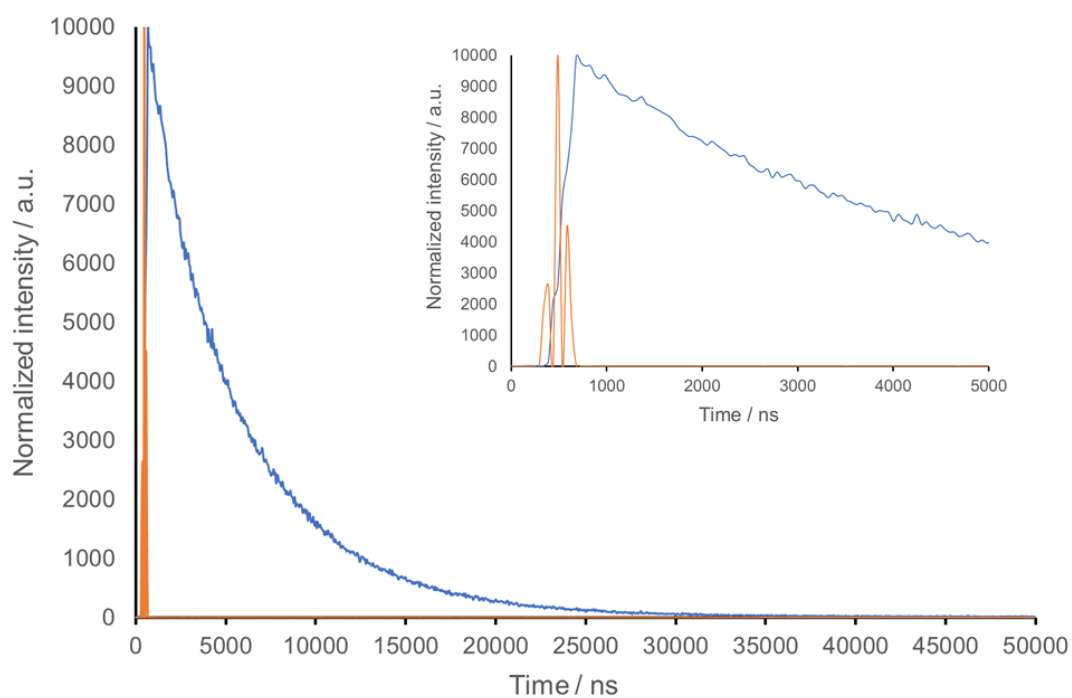

**Figure S18.** Solid-state lifetime decay of [Cu(xantphos)(1)][PF<sub>6</sub>] (blue) and IRF (orange) ( $\lambda_{\text{exc}} = 365$  nm).

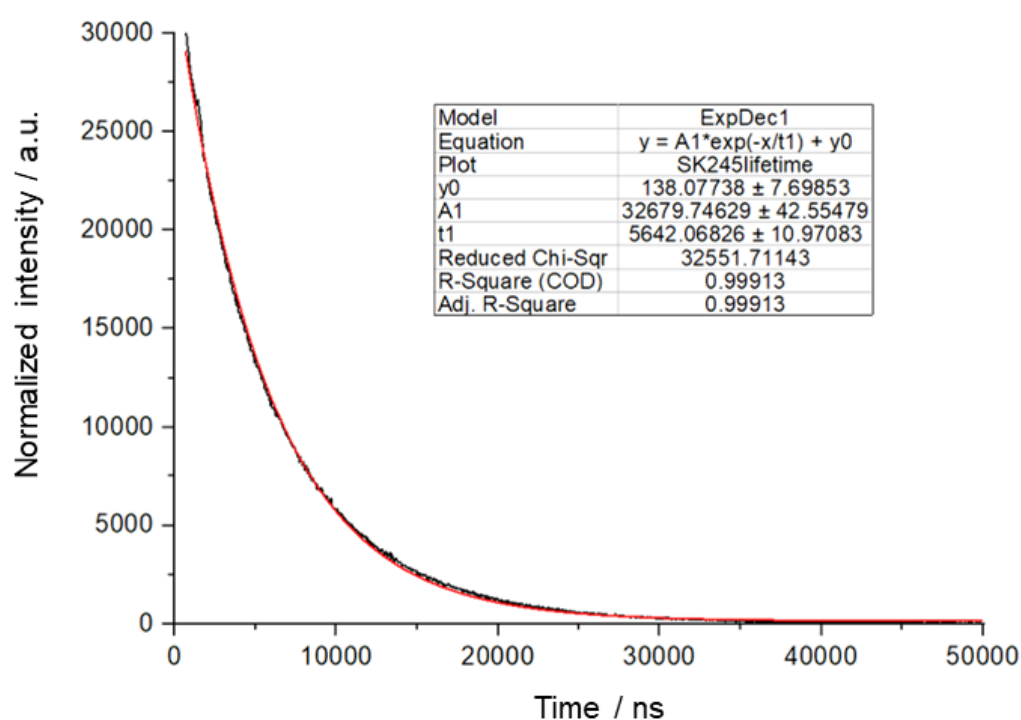

**Figure S19.** Solid-state lifetime decay (black) and first-order fitting curve (red) of [Cu(POP)(2)][PF<sub>6</sub>] ( $\lambda_{\text{exc}} = 365$  nm, exponential fitting done with Origin 2020).

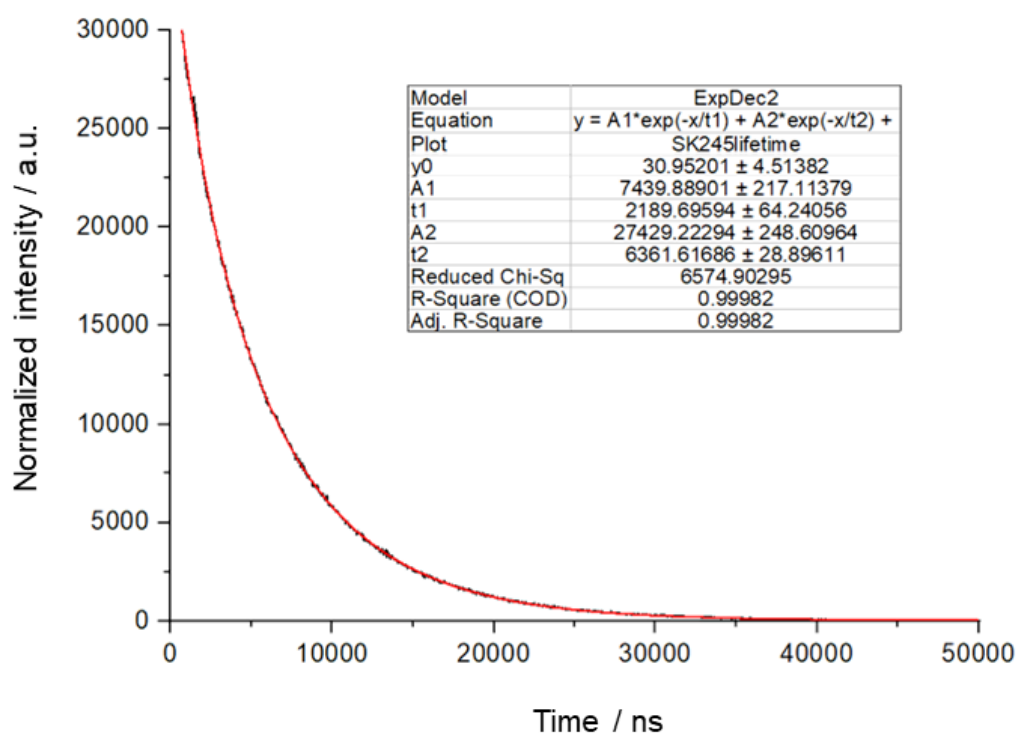

**Figure S20.** Solid-state lifetime decay (black) and second-order fitting curve (red) of [Cu(POP)(2)][PF<sub>6</sub>] ( $\lambda_{\text{exc}} = 365$  nm, exponential fitting done with Origin 2020).

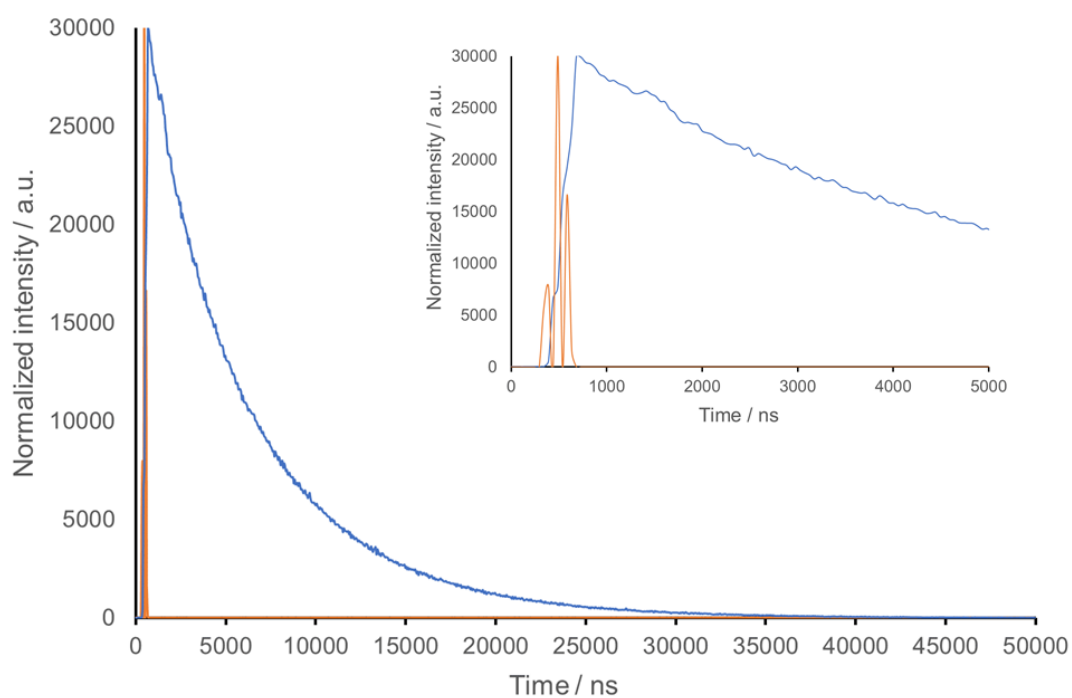

**Figure S21.** Solid-state lifetime decay of [Cu(POP)(2)][PF<sub>6</sub>] (blue) and IRF (orange) ( $\lambda_{\text{exc}} = 365$  nm).

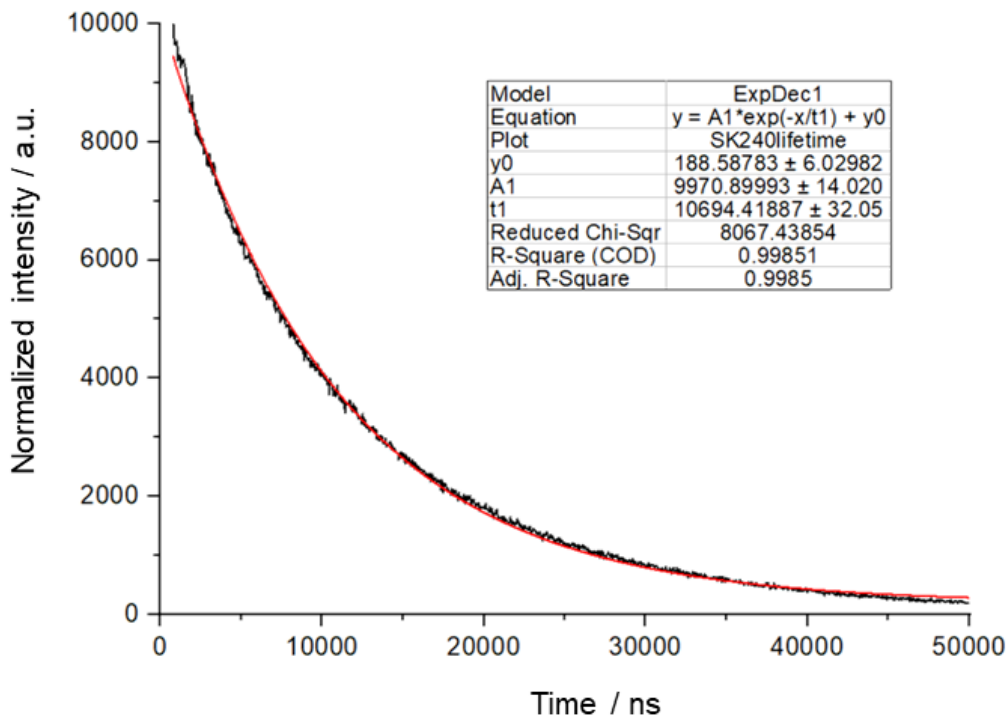

**Figure S22.** Solid-state lifetime decay (black) and first-order fitting curve (red) of [Cu(xantphos)(2)][PF<sub>6</sub>] ( $\lambda_{\text{exc}} = 365$  nm, exponential fitting done with Origin 2020).

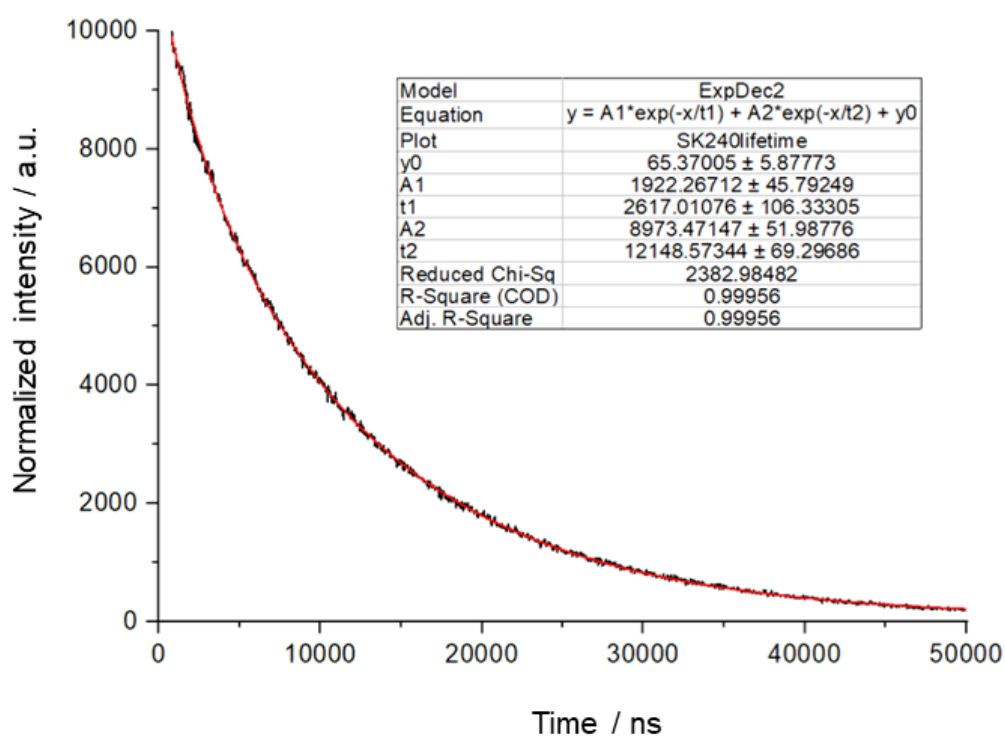

**Figure S23.** Solid-state lifetime decay (black) and second-order fitting curve (red) of [Cu(xantphos)(2)][PF<sub>6</sub>] ( $\lambda_{\text{exc}} = 365$  nm, exponential fitting done with Origin 2020).

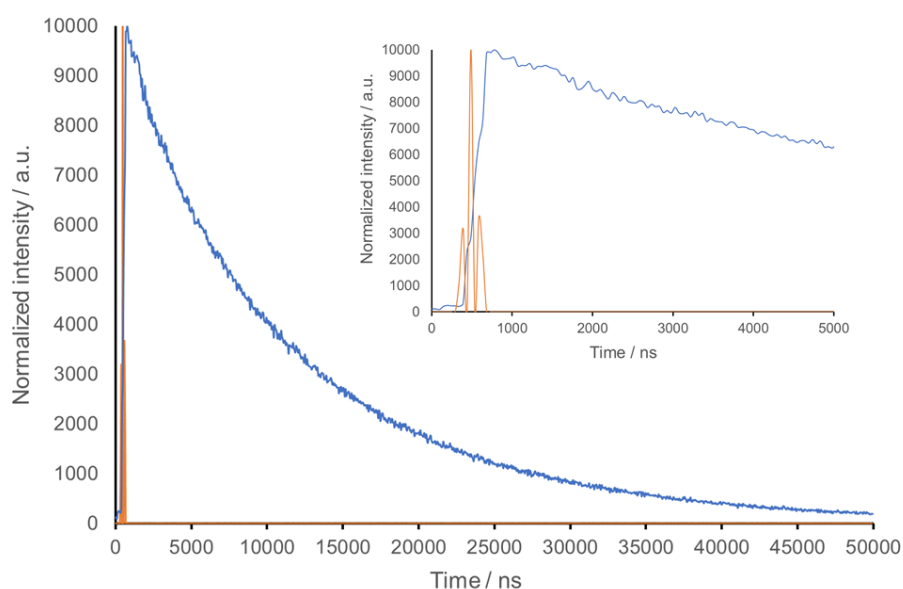

**Figure S24.** Solid-state lifetime decay of [Cu(xantphos)(2)][PF<sub>6</sub>] (blue) and IRF (orange) ( $\lambda_{\text{exc}} = 365$  nm).

**Table S1.** data including CSD refcodes for compounds included in Figure 12. .

| CSD Refcode | Cu...O / Å | P^P ligand | Counterion                      |
|-------------|------------|------------|---------------------------------|
| VICQOQ      | 2.947      | POP        | [PF <sub>6</sub> ] <sup>-</sup> |
| UDOWUI      | 2.977      | POP        | [PF <sub>6</sub> ] <sup>-</sup> |

|        |       |                                                    |                                 |
|--------|-------|----------------------------------------------------|---------------------------------|
| GABLAZ | 3.012 | POP                                                | [PF <sub>6</sub> ] <sup>-</sup> |
| VAWDOP | 3.012 | POP                                                | [PF <sub>6</sub> ] <sup>-</sup> |
| UDOVOB | 3.046 | POP                                                | [PF <sub>6</sub> ] <sup>-</sup> |
| VICROR | 3.046 | POP                                                | [PF <sub>6</sub> ] <sup>-</sup> |
| VAWDEF | 3.048 | POP                                                | [PF <sub>6</sub> ] <sup>-</sup> |
| MEWXOE | 3.062 | POP                                                | [PF <sub>6</sub> ] <sup>-</sup> |
| VICRIL | 3.072 | POP                                                | [PF <sub>6</sub> ] <sup>-</sup> |
| VAWFAD | 3.093 | POP                                                | [PF <sub>6</sub> ] <sup>-</sup> |
| UGANUO | 3.096 | POP                                                | [PF <sub>6</sub> ] <sup>-</sup> |
| UDOVUH | 3.1   | POP                                                | [PF <sub>6</sub> ] <sup>-</sup> |
| UDOXAP | 3.118 | POP                                                | [PF <sub>6</sub> ] <sup>-</sup> |
| UDOWES | 3.129 | POP                                                | [PF <sub>6</sub> ] <sup>-</sup> |
| MEWZIA | 3.149 | POP                                                | [PF <sub>6</sub> ] <sup>-</sup> |
| UDOXET | 3.176 | POP                                                | [PF <sub>6</sub> ] <sup>-</sup> |
| COYHEF | 3.188 | POP                                                | [BF <sub>4</sub> ] <sup>-</sup> |
| BOSVAI | 3.199 | POP                                                | [PF <sub>6</sub> ] <sup>-</sup> |
| MEWYEV | 3.242 | POP                                                | [PF <sub>6</sub> ] <sup>-</sup> |
| BOSYUF | 3.247 | POP                                                | [PF <sub>6</sub> ] <sup>-</sup> |
| GABVEN | 3.253 | POP                                                | [PF <sub>6</sub> ] <sup>-</sup> |
| EVAFAK | 3.281 | POP                                                | [PF <sub>6</sub> ] <sup>-</sup> |
| YITSIG | 3.219 | <sup>t</sup> Bu <sub>2</sub> xantphos <sup>a</sup> | [PF <sub>6</sub> ] <sup>-</sup> |
| HIJRAW | 3.244 | <sup>t</sup> Bu <sub>2</sub> xantphos <sup>a</sup> | [PF <sub>6</sub> ] <sup>-</sup> |
| VAWDUV | 3.051 | xantphos                                           | [PF <sub>6</sub> ] <sup>-</sup> |
| VICRAD | 3.076 | xantphos                                           | [PF <sub>6</sub> ] <sup>-</sup> |
| VANZES | 3.083 | xantphos                                           | [BF <sub>4</sub> ] <sup>-</sup> |
| VICREH | 3.117 | xantphos                                           | [PF <sub>6</sub> ] <sup>-</sup> |
| VANZAO | 3.12  | xantphos                                           | [BF <sub>4</sub> ] <sup>-</sup> |
| EVAFOY | 3.121 | xantphos                                           | [PF <sub>6</sub> ] <sup>-</sup> |
| GABMEE | 3.124 | xantphos                                           | [PF <sub>6</sub> ] <sup>-</sup> |
| VAWDIJ | 3.148 | xantphos                                           | [PF <sub>6</sub> ] <sup>-</sup> |
| EVAFEO | 3.159 | xantphos                                           | [PF <sub>6</sub> ] <sup>-</sup> |
| VANYUH | 3.168 | xantphos                                           | [BF <sub>4</sub> ] <sup>-</sup> |
| GABVAJ | 3.175 | xantphos                                           | [PF <sub>6</sub> ] <sup>-</sup> |
| VANYOB | 3.198 | xantphos                                           | [BF <sub>4</sub> ] <sup>-</sup> |
| EVADOW | 3.203 | xantphos                                           | [PF <sub>6</sub> ] <sup>-</sup> |
| MEWXUK | 3.223 | xantphos                                           | [PF <sub>6</sub> ] <sup>-</sup> |
| EVADUC | 3.224 | xantphos                                           | [PF <sub>6</sub> ] <sup>-</sup> |
| UDOWIW | 3.225 | xantphos                                           | [PF <sub>6</sub> ] <sup>-</sup> |
| UDOWAO | 3.226 | xantphos                                           | [PF <sub>6</sub> ] <sup>-</sup> |
| VICQUW | 3.229 | xantphos                                           | [PF <sub>6</sub> ] <sup>-</sup> |
| GABTUB | 3.232 | xantphos                                           | [PF <sub>6</sub> ] <sup>-</sup> |
| UDOXIX | 3.234 | xantphos                                           | [PF <sub>6</sub> ] <sup>-</sup> |
| GABWAK | 3.244 | xantphos                                           | [PF <sub>6</sub> ] <sup>-</sup> |
| MEWZAS | 3.244 | xantphos                                           | [PF <sub>6</sub> ] <sup>-</sup> |
| UDOXUJ | 3.248 | xantphos                                           | [PF <sub>6</sub> ] <sup>-</sup> |
| UDOWOC | 3.25  | xantphos                                           | [PF <sub>6</sub> ] <sup>-</sup> |
| UDOXOD | 3.257 | xantphos                                           | [PF <sub>6</sub> ] <sup>-</sup> |
| HIJQUP | 3.081 | xantphosMes <sub>2</sub> <sup>b</sup>              | [PF <sub>6</sub> ] <sup>-</sup> |
| YITSOM | 3.132 | xantphosMes <sub>2</sub> <sup>b</sup>              | [PF <sub>6</sub> ] <sup>-</sup> |
| VICQOQ | 2.947 | POP                                                | [PF <sub>6</sub> ] <sup>-</sup> |

|        |       |     |                                 |
|--------|-------|-----|---------------------------------|
| UDOWUI | 2.977 | POP | [PF <sub>6</sub> ] <sup>−</sup> |
| GABLAZ | 3.012 | POP | [PF <sub>6</sub> ] <sup>−</sup> |
| VAWDOP | 3.012 | POP | [PF <sub>6</sub> ] <sup>−</sup> |

<sup>a</sup> <sup>t</sup>Buzxantphos = 2,7-bis(*tert*-butyl)-4,5-bis(diphenylphosphino)-9,9-dimethylxanthene;

<sup>b</sup>xantphosMes<sub>2</sub> = 4,5-bis(mesitylphenylphosphino)-9,9-dimethylxanthene.
